# Supplementary material for: Approaches to long-read sequencing in a clinical setting to improve diagnostic rate
Source: PubMed Central journal article supplement (PMC9548499; doi:10.1038/s41598-022-20113-x), 2022-10-09
Supplement: 41598_2022_20113_MOESM1_ESM.pdf [file 41598_2022_20113_MOESM1_ESM.pdf]

**Supplemental Table 1.** Unsolved cases and their clinical presentation

| <b>Family ID</b> | <b>Clinical Presentation</b>                                                                                                                                                                                                              |
|------------------|-------------------------------------------------------------------------------------------------------------------------------------------------------------------------------------------------------------------------------------------|
| F1               | Hypoplastic left heart syndrome, Atrial dysrhythmias, Chronic respiratory insufficiency and tachypnea, Bell shaped chest, Small embolic stroke, Left vocal cord paresis                                                                   |
| F2               | Siblings: Dystonia, Spastic paraparesis, Gross motor delay, Axonal sensory neuropathy                                                                                                                                                     |
| F3               | Immunodeficiency, chronic lung disease, bronchiolitis obliterans                                                                                                                                                                          |
| F4               | Sunflower epilepsy, Developmental delay                                                                                                                                                                                                   |
| F5               | Skeletal dysplasia, Thrombocytopenia                                                                                                                                                                                                      |
| F6               | Siblings: Paroxysmal dyskinetic events, Gait ataxia                                                                                                                                                                                       |
| F7               | Aseptic meningitis, Pulmonary infiltrates with respiratory distress, respiratory failure requiring mechanical ventilation, Numerous bony lesions involving bilateral humerus, clavicles, ribs, spine, and pelvis, and splenic involvement |
| F8               | Mother and daughter, Hereditary neurodegenerative disorder, spasticity, sensory neuropathy                                                                                                                                                |
| F9               | Left hemihypertrophy, Postnatal overgrowth, Unilateral mesoaxial polydactyly of the left foot, Preauricular tag                                                                                                                           |
| F10              | Heart failure, Hypotonia, Optic nerve hypoplasia                                                                                                                                                                                          |
| F11              | Global developmental delay, Abnormality of movement, EEG abnormality, Hypertonia, Persistent head lag, Small for gestational age, Lactic acidosis                                                                                         |
| F12              | Hepatosplenomegaly, Abnormality of the immune system, Bone mineral abnormality                                                                                                                                                            |
| F13              | Autism Spectrum Disorder, Obesity- BMI 95th percentile, Global developmental delay, Hypotonia                                                                                                                                             |
| F14              | Siblings with Seizures, Abnormal bleeding, Encephalitis, Abnormality of the immune system, Maculopapular exanthema                                                                                                                        |
| F15              | Influenza A encephalitis, Rhabdomyolysis, Respiratory failure, Seizures, Hyponatremia                                                                                                                                                     |
| F16              | Brain anomalies identified at the anatomic scan at approx 20 weeks GA. Severe ventriculomegaly, midline fusion of the fornices, possible subependymal heterotopia, absent cavum septum pellucidum on fetal MRI                            |
| F17              | Micrognathia, Low set ears, Redundant skin folds, Plagiocephaly,                                                                                                                                                                          |
| F18              | Cardiac arrest, Channelopathy family history                                                                                                                                                                                              |
| F19              | Neuromyelitis optica, concern for underlying immune dysregulation                                                                                                                                                                         |
| F20              | Prematurity, Neonatal Heart failure                                                                                                                                                                                                       |
| F21              | Left ventricular dysfunction, Cardiac arrest, Cardiomegaly, Right ventricular hypertrophy, Prolonged QT interval, Respiratory distress, Neonatal hyperbilirubinemia, Edema                                                                |
| F22              | Mixed ataxic and spastic palsy, Cerebellar atrophy                                                                                                                                                                                        |
| F23              | Sensorineural Hearing Loss, Developmental delay, Acquired microcephaly, Abnormal interictal EEG, Multi-focal epilepsy and full body dystonia                                                                                              |
| F24              | Cardiac arrest in infancy                                                                                                                                                                                                                 |
| F25              | Autism spectrum features, bilateral idiopathic cerebellar strokes, bicuspid aortic valve                                                                                                                                                  |
| F26              | Neonatal hemochromatosis, cholestasis                                                                                                                                                                                                     |

F2, F6, F8, F14 represent two members of the same family with the same phenotypic presentation. EEG = electroencephalogram, BMI = body mass index, GA = gestational age, MRI = magnetic resonance imaging

**Supplemental Table 2.** Recall of LRS and SRS for small variants (<50bp) across 32 samples.

| Sample                | %LRS recall (SNVs only) | %LRS recall (indels only) | %SRS recall (SNVs only) | %SRS recall (indels only) | Notes               |
|-----------------------|-------------------------|---------------------------|-------------------------|---------------------------|---------------------|
| C1                    | 99.62%                  | 97.60%                    | 99.18%                  | 97.58%                    |                     |
| C2                    | 99.62%                  | 94.64%                    | 99.19%                  | 94.56%                    |                     |
| C4                    | 99.63%                  | 97.22%                    | 99.22%                  | 97.05%                    |                     |
| C5                    | 99.64%                  | 97.62%                    | 99.23%                  | 97.48%                    |                     |
| F1                    | 99.64%                  | 97.84%                    | 99.25%                  | 97.77%                    |                     |
| F2                    | 99.61%                  | 97.63%                    | 99.24%                  | 97.53%                    |                     |
| F3                    | 99.63%                  | 95.83%                    | 99.18%                  | 95.88%                    |                     |
| F4                    | 99.65%                  | 97.65%                    | 99.32%                  | 97.82%                    |                     |
| F5                    | 99.61%                  | 97.72%                    | 99.18%                  | 97.72%                    |                     |
| F6                    | 99.42%                  | 95.85%                    | 99.19%                  | 96.30%                    |                     |
| F6.2                  | 99.19%                  | 93.08%                    | 99.28%                  | 93.94%                    | sibling in Family 6 |
| F7                    | 99.63%                  | 96.02%                    | 99.37%                  | 96.51%                    |                     |
| F8                    | 99.65%                  | 97.90%                    | 99.22%                  | 97.82%                    |                     |
| F8.2                  | 99.63%                  | 97.72%                    | 99.20%                  | 97.67%                    | sibling in Family 8 |
| F9                    | 99.39%                  | 96.40%                    | 99.16%                  | 97.30%                    |                     |
| F10                   | 99.56%                  | 97.44%                    | 99.04%                  | 97.54%                    |                     |
| F11                   | 99.60%                  | 97.76%                    | 99.14%                  | 97.63%                    |                     |
| F12                   | 99.65%                  | 97.48%                    | 99.24%                  | 97.39%                    |                     |
| F13                   | 99.57%                  | 97.07%                    | 99.25%                  | 97.59%                    |                     |
| F14                   | 99.65%                  | 97.95%                    | 99.20%                  | 97.84%                    |                     |
| F15                   | 99.63%                  | 97.57%                    | 99.26%                  | 97.69%                    |                     |
| F16                   | 99.65%                  | 97.54%                    | 99.31%                  | 97.74%                    |                     |
| F17                   | 99.59%                  | 95.95%                    | 99.16%                  | 95.86%                    |                     |
| F18                   | 99.62%                  | 95.83%                    | 99.23%                  | 95.97%                    |                     |
| F19                   | 99.62%                  | 96.95%                    | 99.23%                  | 97.02%                    |                     |
| F20                   | 99.61%                  | 97.62%                    | 99.23%                  | 97.89%                    |                     |
| F21                   | 99.63%                  | 97.62%                    | 99.23%                  | 97.63%                    |                     |
| F22                   | 99.62%                  | 97.28%                    | 99.21%                  | 97.10%                    |                     |
| F23                   | 99.63%                  | 97.75%                    | 99.19%                  | 97.43%                    |                     |
| F24                   | 99.63%                  | 94.89%                    | 99.23%                  | 94.76%                    |                     |
| F25                   | 99.62%                  | 97.75%                    | 99.17%                  | 97.84%                    |                     |
| F26                   | 99.65%                  | 98.05%                    | 99.22%                  | 97.77%                    |                     |
| <b>Mean (Std.dev)</b> | <b>99.60% (0.09%)</b>   | <b>96.98% (1.16%)</b>     | <b>99.22% (0.06%)</b>   | <b>97.05% (1.05%)</b>     |                     |

Notes:

\* sample C3 had very degraded DNA library (no redraw possible), leading to uncharacteristic bad performance, and not used for this comparison

\* confident regions of HG38 reference genome are fixed to those of HG002 GIAB reference variant set (per best practices of variant assessment [X3] )

**Supplemental Table 3.** Top 35 HPO terms and their associated genes and dead zone sizes.

| HPO term                                           | Number of Genes | Dead Zone Size (bp) | Genes                                                                                                                    |
|----------------------------------------------------|-----------------|---------------------|--------------------------------------------------------------------------------------------------------------------------|
| Autosomal recessive inheritance                    | 20              | 35586               | <i>ACAN C4A HERC2 ADAMTSL2 PHC1 FLG GRAP CORO1A USP18 PMS2 HYDIN STRC MSTO1 NCF1 PIEZO2 OCLN STAT5B OTOA TNXB ANAPC1</i> |
| Azoospermia                                        | 12              | 28532               | <i>PRY2 PRY BPY2 VCY CDY1 CDY2A DAZ1 HSFY1 STRC RBMY1A1 DAZ3 DAZ2</i>                                                    |
| Y-linked inheritance                               | 11              | 25506               | <i>PRY2 PRY BPY2 VCY CDY1 CDY2A DAZ1 HSFY1 RBMY1A1 DAZ3 DAZ2</i>                                                         |
| Autosomal dominant inheritance                     | 19              | 25001               | <i>ACAN HERC2 CEL CES1 CHRNA7 FCGR2B FLG TUBB2B KRT81 KRT86 PMS2 MSTO1 RPS17 PIEZO2 STAT5B CFC1 TNXB TUBB2A ZP3</i>      |
| Male infertility                                   | 7               | 22308               | <i>DAZ1 HYDIN STRC RBMY1A1 DAZ3 DAZ2 DAZ4</i>                                                                            |
| Oligospermia                                       | 6               | 21117               | <i>DAZ1 STRC RBMY1A1 DAZ3 DAZ2 DAZ4</i>                                                                                  |
| Cryptorchidism                                     | 10              | 19495               | <i>HERC2 DAZ1 GTF2I RBMY1A1 NCF1 PIEZO2 ANAPC1 DAZ3 DAZ2 DAZ4</i>                                                        |
| Non-obstructive azoospermia                        | 5               | 18091               | <i>DAZ1 RBMY1A1 DAZ3 DAZ2 DAZ4</i>                                                                                       |
| Decreased testicular size                          | 5               | 18091               | <i>DAZ1 RBMY1A1 DAZ3 DAZ2 DAZ4</i>                                                                                       |
| Sensorineural hearing impairment                   | 6               | 16121               | <i>GRAP GTF2I DUX4 STRC NCF1 OTOA</i>                                                                                    |
| Meningitis                                         | 3               | 16042               | <i>C4A C4B NCF1</i>                                                                                                      |
| Skeletal muscle atrophy                            | 4               | 14395               | <i>DUX4 TUBB2B PIEZO2 TNXB</i>                                                                                           |
| Seizure                                            | 12              | 14366               | <i>IKBKG C4A HERC2 CHRNA7 ADAMTSL2 FCGR2B USP18 TUBB2B PMS2 PIEZO2 OCLN TUBB2A</i>                                       |
| Keratosis pilaris                                  | 3               | 12957               | <i>FLG KRT81 KRT86</i>                                                                                                   |
| Short stature                                      | 15              | 12765               | <i>ACAN IKBKG HERC2 CHRNA7 ADAMTSL2 PHC1 GTF2I TUBB2B MSTO1 NCF1 RPS17 PIEZO2 STAT5B SPIDR ANAPC1</i>                    |
| Abnormal eyelash morphology                        | 3               | 12384               | <i>DUX4 KRT81 KRT86</i>                                                                                                  |
| Elevated circulating creatine kinase concentration | 5               | 12344               | <i>GTF2I DUX4 MSTO1 NCF1 PIEZO2</i>                                                                                      |
| Eczematoid dermatitis                              | 2               | 12242               | <i>FLG NCF1</i>                                                                                                          |
| Hyperlordosis                                      | 3               | 12217               | <i>GTF2I DUX4 NCF1</i>                                                                                                   |

|                                                 |   |       |                                                     |
|-------------------------------------------------|---|-------|-----------------------------------------------------|
| Abnormality of cardiovascular system morphology | 2 | 12074 | <i>CHRNA7 DUX4</i>                                  |
| Asthma                                          | 1 | 12048 | <i>FLG</i>                                          |
| Childhood onset                                 | 1 | 12048 | <i>FLG</i>                                          |
| Ichthyosis                                      | 1 | 12048 | <i>FLG</i>                                          |
| Dry skin                                        | 1 | 12048 | <i>FLG</i>                                          |
| Palmar hyperlinearity                           | 1 | 12048 | <i>FLG</i>                                          |
| Cataract                                        | 8 | 11689 | <i>IKBKG C4A GTF2I TUBB2B KRT81 KRT86 NCF1 OCLN</i> |
| Mask-like facies                                | 2 | 11518 | <i>DUX4 PIEZO2</i>                                  |
| Palpebral edema                                 | 1 | 11475 | <i>DUX4</i>                                         |
| EMG abnormality                                 | 1 | 11475 | <i>DUX4</i>                                         |
| Abnormal retinal vascular morphology            | 1 | 11475 | <i>DUX4</i>                                         |
| Hyperreflexia                                   | 6 | 10557 | <i>C4A PHC1 GTF2I TUBB2B NCF1 OCLN</i>              |
| Arthralgia                                      | 4 | 10482 | <i>C4A GTF2I NCF1 TNXB</i>                          |
| Gait disturbance                                | 4 | 10140 | <i>IKBKG C4A TUBB2B PMS2</i>                        |
| Gastrointestinal hemorrhage                     | 4 | 10131 | <i>C4A FCGR2C PMS2 TNXB</i>                         |
| Fatigue                                         | 4 | 10036 | <i>C4A PMS2 STAT5B TNXB</i>                         |

EMG = electromyography

**Supplemental Table 4.** Solved and unsolved cases by sequencing type

| <b>Sample</b> | <b>Detectable by SRS</b>                                 | <b>Detectable by LRS</b>    |
|---------------|----------------------------------------------------------|-----------------------------|
| C1            | Yes, as a copy gain                                      | Yes, as a translocation     |
| C2            | False positive translocation                             | True negative translocation |
| C3            | Yes                                                      | Yes                         |
| C4            | No, except by special processing                         | Yes                         |
| C5            | UPD but not methylation detectable by special processing | Yes                         |
| F1            | undiagnosed                                              | undiagnosed                 |
| F2            | undiagnosed                                              | undiagnosed                 |
| F3            | undiagnosed                                              | undiagnosed                 |
| F4            | undiagnosed                                              | undiagnosed                 |

|     |                              |             |
|-----|------------------------------|-------------|
| F5  | undiagnosed                  | undiagnosed |
| F6  | undiagnosed                  | undiagnosed |
| F7  | undiagnosed                  | undiagnosed |
| F8  | undiagnosed                  | undiagnosed |
| F9  | undiagnosed                  | undiagnosed |
| F10 | undiagnosed                  | undiagnosed |
| F11 | undiagnosed                  | undiagnosed |
| F12 | Yes, with special processing | Yes         |
| F13 | undiagnosed                  | undiagnosed |
| F14 | undiagnosed                  | undiagnosed |
| F15 | undiagnosed                  | undiagnosed |
| F16 | undiagnosed                  | undiagnosed |
| F17 | undiagnosed                  | undiagnosed |
| F18 | undiagnosed                  | undiagnosed |
| F19 | undiagnosed                  | undiagnosed |
| F20 | undiagnosed                  | undiagnosed |
| F21 | undiagnosed                  | undiagnosed |
| F22 | undiagnosed                  | undiagnosed |
| F23 | undiagnosed                  | undiagnosed |
| F24 | undiagnosed                  | undiagnosed |
| F25 | undiagnosed                  | undiagnosed |
| F26 | undiagnosed                  | undiagnosed |

**Supplemental Figure 1. Long read results from positive control samples.** A) Ribbon plot showing apparent translocation from chromosome 11 (orange) to chromosome 22 (green), projected onto assembled alternate contig (black) for control sample C1. B) IGV screen shot showing insertion (purple)

of ~3.5Kbp into SCAI in control sample C2. C) BLAT results from 3.5Kbp insertion (grey) shows alignment to processed pseudogene SMAD4. D) Ribbon plot showing inversion on chromosome 8 (purple) projected onto assembled alternate contig (black) for control sample C3. E) IGV screen shot showing 2bp deletion in *IKBKG* in sample C4.

**A**

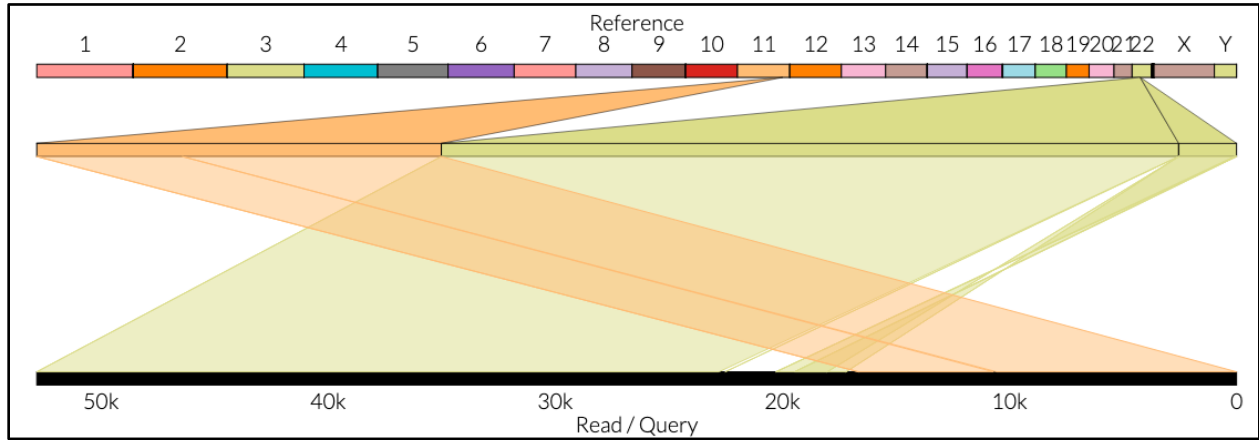

**B**

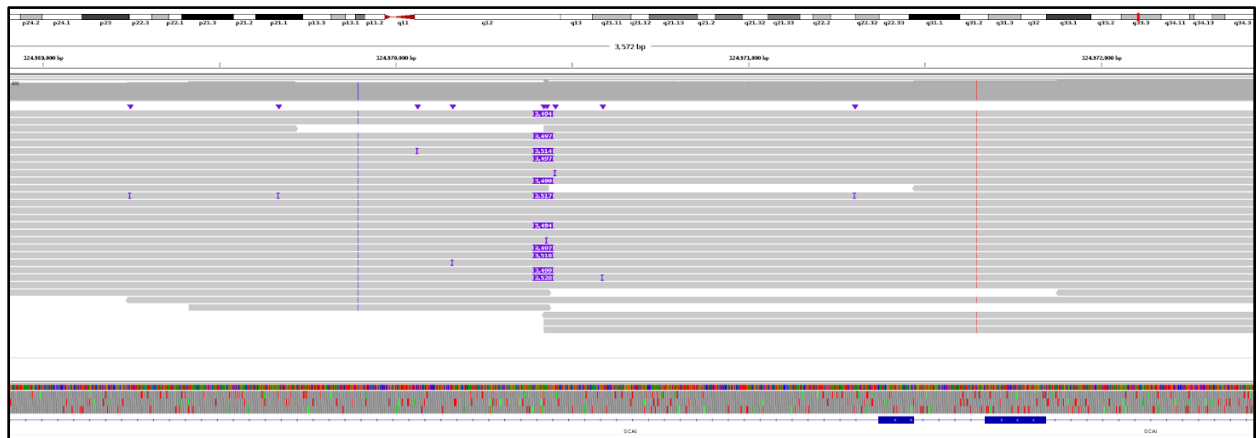

**C**

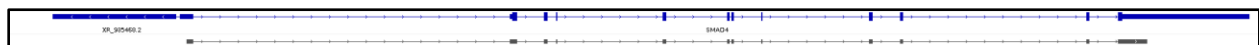

**D**

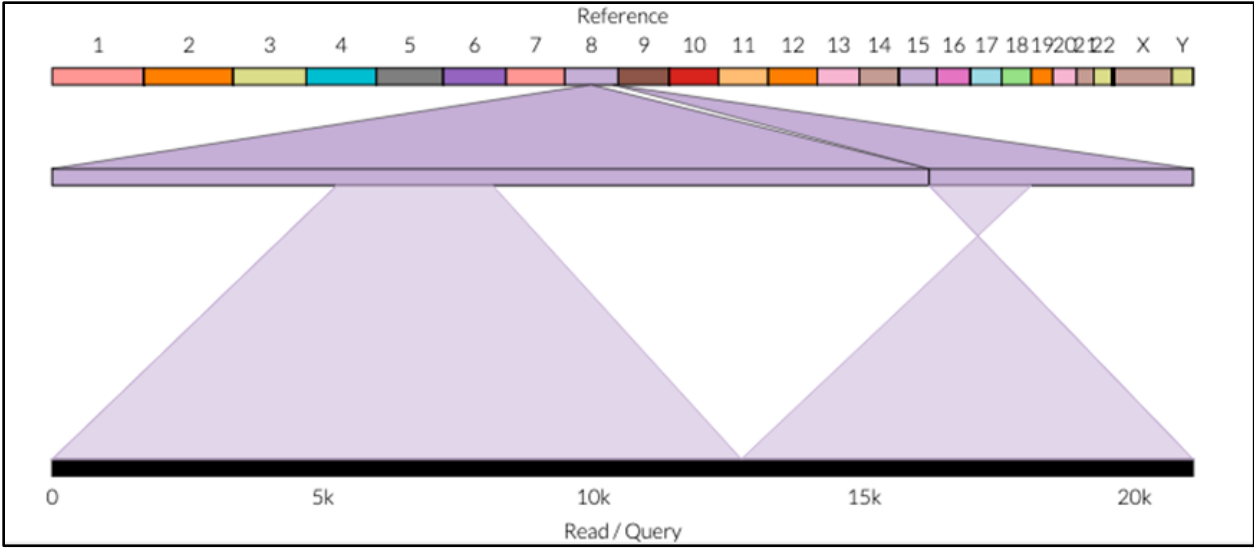

E

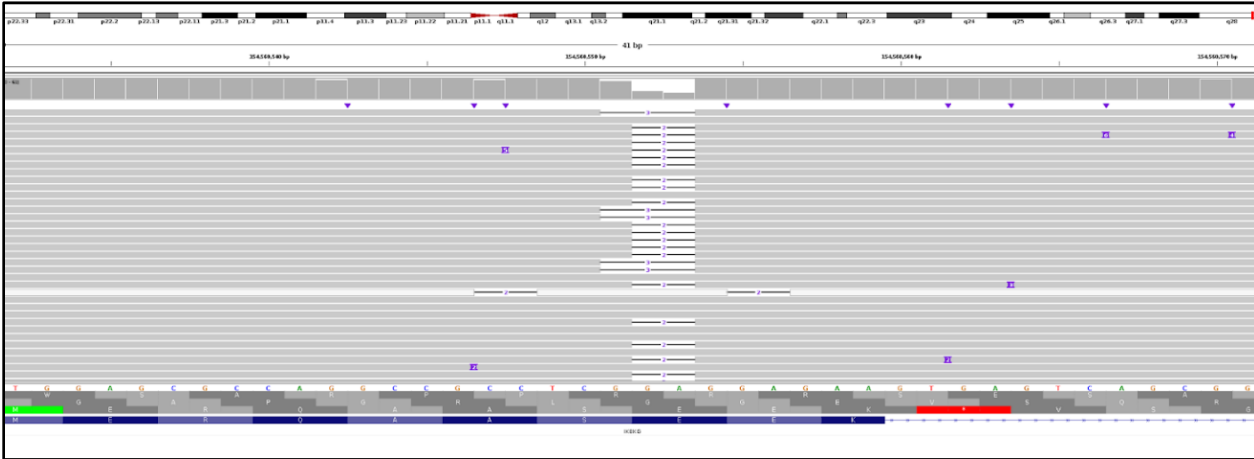

**Supplemental Figure 2.** Stop-loss variant in IKBKG causes an extension of the reading frame by 27 amino acids. Genomic DNA is shown with putative protein translation below. Alternating codons are underlined. Stop codon (TER) shown in bold. DNA variant and subsequent change to the amino acid residue shown in bold red.

|                                                                                                       |
|-------------------------------------------------------------------------------------------------------|
| <u>TGCATTGAGTAGGGCCGGCCAGTGCAAGGCCACTGCCTGCCGAGGACGTGCCCGGGACCGTGCAAGTCTGCGCTTTCCTCTCCCGCCTGCCTAG</u> |
| C I E <b>TER</b>                                                                                      |
| <u>TGCATTGAGTACGGCCGGCCAGTGCAAGGCCACTGCCTGCCGAGGACGTGCCCGGGACCGTGCAAGTCTGCGCTTTCCTCTCCCGCCTGCCTAG</u> |
| C I E <b>Y</b> G R P V Q G H C L P R T C P G P C S L R F P L P P A <b>TER</b>                         |
